# Supplementary material
Source: PubMed Central journal article supplement (PMC8285957)
Supplement: pnas.2101189118.sapp.pdf [file pnas.2101189118.sapp.pdf]

## Supplementary Materials

### **RIPK1 activates distinct gasdermins in macrophages and neutrophils upon pathogen blockade of innate immune signalling**

Kaiwen W. Chen<sup>1,2,\*#</sup>, Benjamin Demarco<sup>1\*</sup>, Saray Ramos<sup>1</sup>, Rosalie Heilig<sup>1</sup>, Michiel Goris<sup>1</sup>, James P Grayczyk<sup>3</sup>, Charles-Antoine Assenmacher<sup>3</sup>, Enrico Radaelli<sup>3</sup>, Leonel D. Joannas<sup>4,5</sup>, Jorge Henao-Mejia<sup>4,5,6</sup>, Fabienne Tacchini-Cottier<sup>1</sup>, Igor E Brodsky<sup>3,5</sup>, Petr Broz<sup>1#</sup>

<sup>1</sup>Department of Biochemistry, University of Lausanne, CH-1066 Epalinges, Switzerland

<sup>2</sup>Immunology Translational Research Programme and Department of Microbiology & Immunology, Yong Loo Lin School of Medicine, National University of Singapore, Singapore

<sup>3</sup>Department of Pathobiology, University of Pennsylvania School of Veterinary Medicine, Philadelphia, PA, USA

<sup>4</sup>Department of Pathology and Laboratory Medicine, University of Pennsylvania, Philadelphia, PA 19104, USA.

<sup>5</sup>Institute for Immunology, University of Pennsylvania Perelman School of Medicine, Philadelphia, PA, USA

<sup>6</sup>Division of Protective Immunity, Department of Pathology and Laboratory Medicine, Children's Hospital of Philadelphia, University of Pennsylvania, Philadelphia, PA 19104, USA.

\*Equal contribution

#Correspondence to: [kaiwen.chen@nus.edu.sg](mailto:kaiwen.chen@nus.edu.sg) or [petr.broz@unil.ch](mailto:petr.broz@unil.ch)

Keywords: gasdermin, RIPK1, Yersinia, caspase-8, IL-1

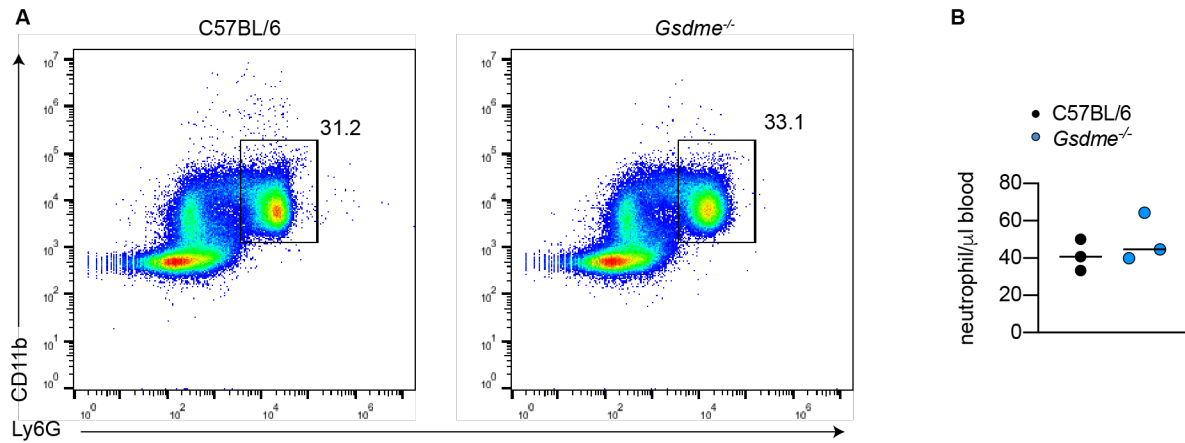

**Figure S1. GSDME does not regulate neutrophils numbers *in vivo*.** (A) Total bone marrow from 16-week old male WT and *Gsdme*<sup>-/-</sup> littermate controls were stained with CD11b and Ly6G and analysed by flow cytometry. Data are representative from 4 animals. (B) Blood neutrophils were quantified from 8-week old WT and *Gsdme*<sup>-/-</sup> mice by flow cytometry.

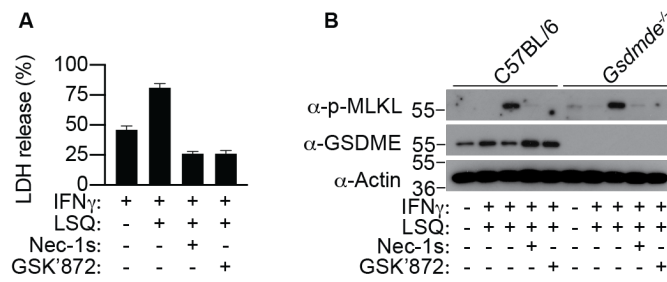

**Figure S2. LSQ triggers necroptosis in neutrophils.** (A) IFN $\gamma$ -primed neutrophils were stimulated with LPS/SMAC mimetic/QVD (LSQ) for 16 h in the presence or absence of Nec-1s or GSK'872. (B) WT and *Gsdme*<sup>-/-</sup> neutrophils were primed with IFN $\gamma$  and stimulated with LSQ for 15 h and mixed supernatant and cell extracts were analysed by western blot. (A) Data are + SD from triplicate well stimulation representative of 2 experiments.

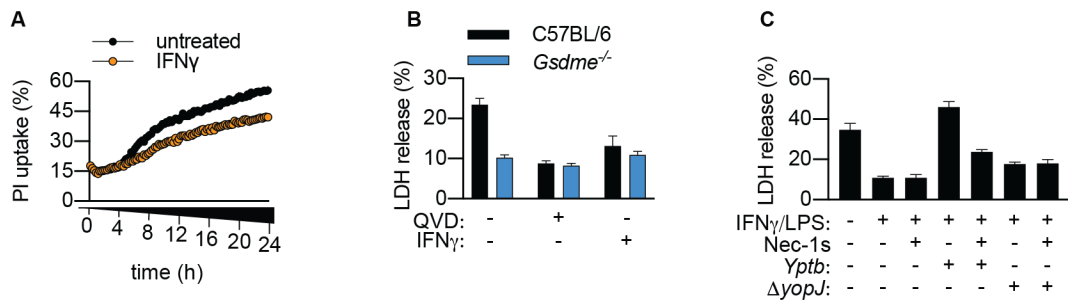

**Figure S3. IFN $\gamma$  priming reduces spontaneous neutrophil lysis.** (A) Neutrophils were left untreated or stimulated with IFN $\gamma$  and propidium iodine (PI) uptake was quantified over 24 h. (B) Neutrophils were left untreated or stimulated with QVD or IFN $\gamma$  and LDH release were quantified after 6 h. (C) Neutrophils were infection with *Yptb* or the  $\Delta yopJ$  and LDH was quantified at 6 h. (A-C) Data are + SD from triplicate well stimulation representative of 2 experiments.

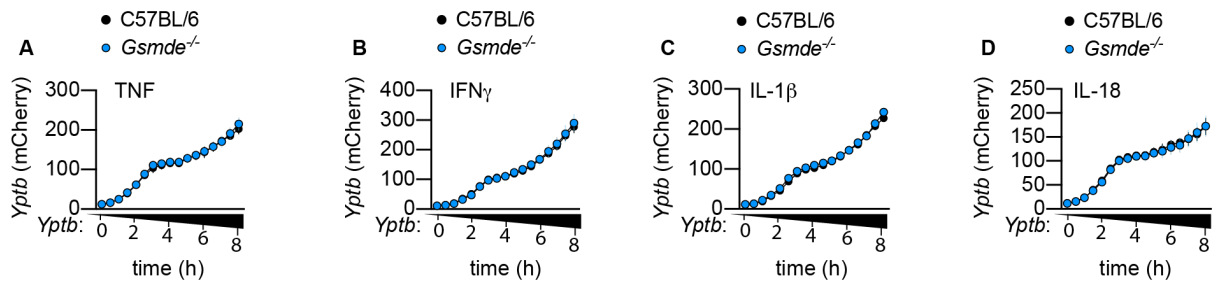

**Figure S4. GSDME does not promote bacterial clearance in a cell-intrinsic manner.** WT and *Gsdme*<sup>-/-</sup> neutrophils were primed with pro-inflammatory cytokines (all 100 ng/ml) for 3 h and challenged with *Y. pseudotuberculosis* (*Yptb*) for 8 h (MOI 1) and bacterial replication (mCherry) was quantified over time. (A-D) Data are mean + SD from triplicate well stimulation representative of 3 independent experiments.

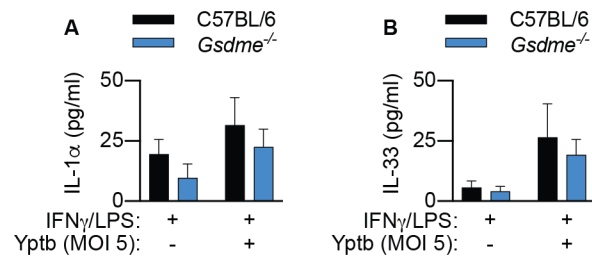

**Figure S5. Pyroptotic neutrophils do not release IL-1 $\alpha$  or IL-33.** IFN $\gamma$ /LPS-primed neutrophils were infected with *Y. pseudotuberculosis* (*Yptb*) for 4 hours. (A-B) Data are mean + SD for technical triplicates representative from 3 independent experiments.

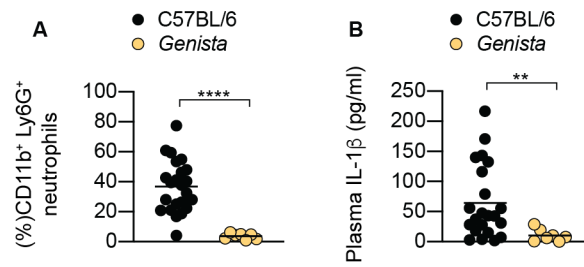

**Fig. S6. Neutrophils drive IL-1 $\beta$  release during *Yersinia* infection.** (A-B) WT and neutropenic *Genista* mice were challenged with *Yptb* for 5 days. (A-B) The frequency of blood CD11b<sup>+</sup>Ly6G<sup>+</sup> neutrophils were analysed by flow cytometry and the levels of plasma IL-1 $\beta$  analysed by ELISA. Data are mean pooled from 2 independent experiments. \*\*P < 0.01, \*\*\*\*P<0.0001.
